# Supplementary material
Source: PubMed Central journal article supplement (PMC2646635)

**Interconversion of the *cis*-5*R*,6*S*- and *trans*-5*R*,6*R*-Thymine Glycol Lesions in Duplex DNA**

**Supporting Information**

**Revised Manuscript**

Kyle L. Brown, Travis Adams, Ashis K. Basu,<sup>§</sup> and Michael P. Stone\*

Department of Chemistry, Center in Molecular Toxicology, Vanderbilt-Ingram Cancer Center, Vanderbilt University, Nashville, Tennessee 37235, and <sup>§</sup>Department of Chemistry, University of Connecticut, Storrs, Connecticut 06269.

\*Author to whom correspondence should be addressed.

Michael P. Stone

Telephone 615-322-2589

FAX 615-322-7591

email: michael.p.stone@vanderbilt.edu

**Running Title:** *cis*-5*R*,6*S*- and *trans*-5*R*,6*R*-Thymine Glycol Lesions in DNA

Complete Citation Information for Reference 31

Frisch, M. J.; Trucks, G. W.; Schlegel, H. B.; Scuseria, G. E.; Robb, M. A.; Cheeseman, J. R.; Montgomery, J. A.; Vreven, T.; Kudin, K. N.; Burant, J. C.; Millam, J. M.; Iyengar, S. S.; Tomasi, J.; Barone, V.; Mennucci, B.; Cossi, M.; Scalmani, G.; Rega, N.; Petersson, G. A.; Nakatsuji, H.; Hada, M.; Ehara, M.; Toyota, K.; Fukuda, R.; Hasegawa, J.; Ishida, M.; Nakajima, T.; Honda, Y.; Kitao, O.; Nakai, H.; Klene, M.; Li, X.; Knox, J. E.; Hratchian, H. P.; Cross, J. B.; Adamo, C.; Jaramillo, J.; Gomperts, R.; Stratmann, R. E.; Yazyev, O.; Austin, A. J.; Cammi, R.; Pomelli, C.; Pomelli, J.; Ochterski, W.; Ayala, P. Y.; Morokuma, K.; Voth, G. A.; Salvador, P.; Dannenberg, J. J.; Zakrzewska, V. G.; Daniels, A. D.; Farkas, O.; Rabuck, A. D.; Raghavachari, K.; Ortiz, J. V. **2004** *Gaussian, Inc., Wallingford, CT.*

**Table S1.** Resonance assignments for the unmodified 5'-G<sup>1</sup>T<sup>2</sup>G<sup>3</sup>C<sup>4</sup>G<sup>5</sup>T<sup>6</sup>G<sup>7</sup>T<sup>8</sup>T<sup>9</sup>T<sup>10</sup>G<sup>11</sup>T<sup>12</sup>-3'•5'-A<sup>13</sup>C<sup>14</sup>A<sup>15</sup>A<sup>16</sup>A<sup>17</sup>C<sup>18</sup>A<sup>19</sup>C<sup>20</sup>G<sup>21</sup>C<sup>22</sup>A<sup>23</sup>C<sup>24</sup>-3'

| <i>Primary Strand</i> |                 |                             | <i>Complementary Strand</i> |             |                             |
|-----------------------|-----------------|-----------------------------|-----------------------------|-------------|-----------------------------|
| <i>Residue</i>        | <i>Atom</i>     | <i>Chemical Shift (ppm)</i> | <i>Residue</i>              | <i>Atom</i> | <i>Chemical Shift (ppm)</i> |
| G <sup>1</sup>        | H1'             | 5.88                        | A <sup>13</sup>             | H1'         | 6.03                        |
| G <sup>1</sup>        | H2'             | 2.50                        | A <sup>13</sup>             | H2'         | 2.43                        |
| G <sup>1</sup>        | H2''            | 2.66                        | A <sup>13</sup>             | H2''        | 2.61                        |
| G <sup>1</sup>        | H3'             | 4.68                        | A <sup>13</sup>             | H3'         | 4.68                        |
| G <sup>1</sup>        | H5'             | 4.09                        | A <sup>13</sup>             | H4'         | 4.09                        |
| G <sup>1</sup>        | H8              | 7.82                        | A <sup>13</sup>             | H5'         | 3.94                        |
| T <sup>2</sup>        | CH <sub>3</sub> | 1.24                        | A <sup>13</sup>             | H8          | 8.04                        |
| T <sup>2</sup>        | H1'             | 5.78                        | C <sup>14</sup>             | H1'         | 6.03                        |
| T <sup>2</sup>        | H2'             | 2.08                        | C <sup>14</sup>             | H2'         | 1.86                        |
| T <sup>2</sup>        | H2''            | 2.42                        | C <sup>14</sup>             | H2''        | 2.08                        |
| T <sup>2</sup>        | H3              | 13.67                       | C <sup>14</sup>             | H3'         | 4.99                        |
| T <sup>2</sup>        | H3'             | 4.77                        | C <sup>14</sup>             | H42         | 8.20                        |
| T <sup>2</sup>        | H4'             | 4.12                        | C <sup>14</sup>             | H5          | 5.34                        |
| T <sup>2</sup>        | H5'             | 4.00                        | C <sup>14</sup>             | H6          | 7.26                        |
| T <sup>2</sup>        | H5''            | 3.95                        | A <sup>15</sup>             | H1'         | 5.62                        |
| T <sup>2</sup>        | H6              | 7.23                        | A <sup>15</sup>             | H2          | 7.10                        |
| G <sup>3</sup>        | H1              | 12.59                       | A <sup>15</sup>             | H2'         | 2.59                        |
| G <sup>3</sup>        | H1'             | 5.77                        | A <sup>15</sup>             | H2''        | 2.69                        |
| G <sup>3</sup>        | H2'             | 2.47                        | A <sup>15</sup>             | H3'         | 4.89                        |

|                |      |       |                 |      |      |
|----------------|------|-------|-----------------|------|------|
| G <sup>3</sup> | H2'' | 2.59  | A <sup>15</sup> | H4'  | 4.22 |
| G <sup>3</sup> | H22  | 6.38  | A <sup>15</sup> | H5'  | 4.06 |
| G <sup>3</sup> | H3'  | 4.85  | A <sup>15</sup> | H62  | 6.04 |
| G <sup>3</sup> | H4'  | 4.23  | A <sup>15</sup> | H8   | 8.06 |
| G <sup>3</sup> | H5'  | 4.07  | A <sup>16</sup> | H1'  | 5.73 |
| G <sup>3</sup> | H8   | 7.73  | A <sup>16</sup> | H2   | 6.99 |
| C <sup>4</sup> | H1'  | 5.55  | A <sup>16</sup> | H2'  | 2.49 |
| C <sup>4</sup> | H2'  | 1.89  | A <sup>16</sup> | H2'' | 2.69 |
| C <sup>4</sup> | H2'' | 2.25  | A <sup>16</sup> | H3'  | 4.91 |
| C <sup>4</sup> | H3'  | 4.69  | A <sup>16</sup> | H4'  | 4.29 |
| C <sup>4</sup> | H4'  | 4.05  | A <sup>16</sup> | H5'  | 4.09 |
| C <sup>4</sup> | H42  | 8.13  | A <sup>16</sup> | H5'' | 4.06 |
| C <sup>4</sup> | H5   | 5.15  | A <sup>16</sup> | H61  | 7.27 |
| C <sup>4</sup> | H5'  | 4.01  | A <sup>16</sup> | H62  | 6.00 |
| C <sup>4</sup> | H6   | 7.15  | A <sup>16</sup> | H8   | 7.96 |
| C <sup>4</sup> | H1'  | 5.55  | A <sup>17</sup> | H1'  | 5.89 |
| G <sup>5</sup> | H1   | 12.63 | A <sup>17</sup> | H2   | 7.39 |
| G <sup>5</sup> | H1'  | 5.81  | A <sup>17</sup> | H2'  | 2.38 |
| G <sup>5</sup> | H2'  | 2.45  | A <sup>17</sup> | H2'' | 2.68 |
| G <sup>5</sup> | H2'' | 2.63  | A <sup>17</sup> | H3'  | 4.84 |
| G <sup>5</sup> | H22  | 6.39  | A <sup>17</sup> | H4'  | 4.09 |
| G <sup>5</sup> | H3'  | 4.81  | A <sup>17</sup> | H5'  | 4.28 |
| G <sup>5</sup> | H4'  | 4.21  | A <sup>17</sup> | H61  | 7.19 |
| G <sup>5</sup> | H5'  | 3.91  | A <sup>17</sup> | H8   | 7.89 |
| G <sup>5</sup> | H5'' | 4.06  | C <sup>18</sup> | H1'  | 5.33 |
| G <sup>5</sup> | H8   | 7.72  | C <sup>18</sup> | H2'  | 1.70 |

|                |                 |       |                 |      |       |
|----------------|-----------------|-------|-----------------|------|-------|
| T <sup>6</sup> | CH <sub>3</sub> | 1.31  | C <sup>18</sup> | H2'' | 2.14  |
| T <sup>6</sup> | H1'             | 5.66  | C <sup>18</sup> | H3'  | 4.60  |
| T <sup>6</sup> | H2'             | 1.97  | C <sup>18</sup> | H4'  | 3.97  |
| T <sup>6</sup> | H2''            | 2.36  | C <sup>18</sup> | H42  | 7.82  |
| T <sup>6</sup> | H3              | 13.46 | C <sup>18</sup> | H5   | 5.00  |
| T <sup>6</sup> | H3'             | 4.72  | C <sup>18</sup> | H5'  | 3.85  |
| T <sup>6</sup> | H4'             | 4.05  | C <sup>18</sup> | H6   | 6.98  |
| T <sup>6</sup> | H5'             | 3.99  | A <sup>19</sup> | H1'  | 5.98  |
| T <sup>6</sup> | H6              | 7.00  | A <sup>19</sup> | H2   | 7.42  |
| G <sup>7</sup> | H1              | 12.36 | A <sup>19</sup> | H2'  | 2.47  |
| G <sup>7</sup> | H1'             | 5.83  | A <sup>19</sup> | H2'' | 2.68  |
| G <sup>7</sup> | H2'             | 2.65  | A <sup>19</sup> | H3'  | 4.83  |
| G <sup>7</sup> | H2''            | 2.45  | A <sup>19</sup> | H4'  | 3.97  |
| G <sup>7</sup> | H22             | 6.36  | A <sup>19</sup> | H5'  | 4.22  |
| G <sup>7</sup> | H3'             | 4.79  | A <sup>19</sup> | H61  | 5.80  |
| G <sup>7</sup> | H4'             | 4.12  | A <sup>19</sup> | H8   | 7.99  |
| G <sup>7</sup> | H5'             | 4.23  | C <sup>20</sup> | H1'  | 5.39  |
| G <sup>7</sup> | H5''            | 4.01  | C <sup>20</sup> | H2'  | 1.78  |
| G <sup>7</sup> | H8              | 7.68  | C <sup>20</sup> | H2'' | 2.15  |
| T <sup>8</sup> | CH <sub>3</sub> | 1.17  | C <sup>20</sup> | H3'  | 4.83  |
| T <sup>8</sup> | H1'             | 5.88  | C <sup>20</sup> | H4'  | 3.97  |
| T <sup>8</sup> | H2'             | 2.00  | C <sup>20</sup> | H42  | 7.99  |
| T <sup>8</sup> | H2''            | 1.46  | C <sup>20</sup> | H5   | 5.02  |
| T <sup>8</sup> | H3              | 13.86 | C <sup>20</sup> | H6   | 7.04  |
| T <sup>8</sup> | H3'             | 4.71  | G <sup>21</sup> | H1   | 12.71 |
| T <sup>8</sup> | H4'             | 4.02  | G <sup>21</sup> | H1'  | 5.69  |

|                 |      |       |                 |      |      |
|-----------------|------|-------|-----------------|------|------|
| T <sup>8</sup>  | H5'  | 4.12  | G <sup>21</sup> | H2'  | 2.45 |
| T <sup>8</sup>  | H6   | 7.10  | G <sup>21</sup> | H2'' | 2.55 |
| T <sup>9</sup>  | H1'  | 5.98  | G <sup>21</sup> | H22  | 6.30 |
| T <sup>9</sup>  | H2'  | 2.45  | G <sup>21</sup> | H3'  | 4.81 |
| T <sup>9</sup>  | H2'' | 1.57  | G <sup>21</sup> | H4'  | 4.19 |
| T <sup>9</sup>  | H3   | 13.85 | G <sup>21</sup> | H5'  | 3.98 |
| T <sup>9</sup>  | H3'  | 4.74  | G <sup>21</sup> | H8   | 7.67 |
| T <sup>9</sup>  | H4'  | 4.07  | C <sup>22</sup> | H1'  | 5.47 |
| T <sup>9</sup>  | H5'  | 4.02  | C <sup>22</sup> | H2'  | 1.86 |
| T <sup>9</sup>  | H6   | 7.31  | C <sup>22</sup> | H2'' | 2.22 |
| T <sup>10</sup> | H1'  | 5.69  | C <sup>22</sup> | H3'  | 4.67 |
| T <sup>10</sup> | H2'  | 1.84  | C <sup>22</sup> | H4'  | 4.00 |
| T <sup>10</sup> | H2'' | 2.23  | C <sup>22</sup> | H42  | 8.25 |
| T <sup>10</sup> | H3   | 13.77 | C <sup>22</sup> | H5   | 5.25 |
| T <sup>10</sup> | H3'  | 4.75  | C <sup>22</sup> | H6   | 7.19 |
| T <sup>10</sup> | H4'  | 4.05  | A <sup>23</sup> | H1'  | 6.10 |
| T <sup>10</sup> | H5'  | 3.97  | A <sup>23</sup> | H2   | 7.68 |
| T <sup>10</sup> | H6   | 7.16  | A <sup>23</sup> | H2'  | 2.53 |
| G <sup>11</sup> | H1   | 12.54 | A <sup>23</sup> | H2'' | 2.72 |
| G <sup>11</sup> | H1'  | 5.93  | A <sup>23</sup> | H3'  | 4.85 |
| G <sup>11</sup> | H2'  | 2.57  | A <sup>23</sup> | H4'  | 4.24 |
| G <sup>11</sup> | H2'' | 1.50  | A <sup>23</sup> | H5'  | 4.11 |
| G <sup>11</sup> | H22  | 6.53  | A <sup>23</sup> | H5'' | 3.92 |
| G <sup>11</sup> | H3'  | 4.86  | A <sup>23</sup> | H8   | 8.11 |
| G <sup>11</sup> | H4'  | 4.26  | C <sup>24</sup> | H1'  | 5.94 |
| G <sup>11</sup> | H5'  | 3.95  | C <sup>24</sup> | H2'  | 1.95 |

|                 |      |      |                 |      |      |
|-----------------|------|------|-----------------|------|------|
| G <sup>11</sup> | H5'' | 4.10 | C <sup>24</sup> | H2'' | 1.98 |
| G <sup>11</sup> | H8   | 7.83 | C <sup>24</sup> | H3'  | 4.33 |
| T <sup>12</sup> | H1'  | 6.11 | C <sup>24</sup> | H4'  | 3.87 |
| T <sup>12</sup> | H2'  | 2.11 | C <sup>24</sup> | H5   | 5.29 |
| T <sup>12</sup> | H3'  | 4.40 | C <sup>24</sup> | H6   | 7.25 |
| T <sup>12</sup> | H4'  | 3.95 |                 |      |      |
| T <sup>12</sup> | H6   | 7.30 |                 |      |      |

**Table S2.** Resonance assignments for the *cis*-5*R*,6*S*-thymine glycol modified 5'-  
G<sup>1</sup>T<sup>2</sup>G<sup>3</sup>C<sup>4</sup>G<sup>5</sup>T<sup>6</sup>G<sup>7</sup>T<sup>8</sup>T<sup>9</sup>T<sup>10</sup>G<sup>11</sup>T<sup>12</sup>-3'•5'-A<sup>13</sup>C<sup>14</sup>A<sup>15</sup>A<sup>16</sup>A<sup>17</sup>C<sup>18</sup>A<sup>19</sup>C<sup>20</sup>G<sup>21</sup>C<sup>22</sup>A<sup>23</sup>C<sup>24</sup>-3'

| Primary Strand |                 |                             | Complementary Strand |             |                             |
|----------------|-----------------|-----------------------------|----------------------|-------------|-----------------------------|
| <i>Residue</i> | <i>Atom</i>     | <i>Chemical Shift (ppm)</i> | <i>Residue</i>       | <i>Atom</i> | <i>Chemical Shift (ppm)</i> |
| G <sup>1</sup> | H1'             | 5.87                        | A <sup>13</sup>      | H1'         | 6.02                        |
| G <sup>1</sup> | H2'             | 2.47                        | A <sup>13</sup>      | H2'         | 2.42                        |
| G <sup>1</sup> | H2''            | 2.64                        | A <sup>13</sup>      | H2''        | 2.58                        |
| G <sup>1</sup> | H3'             | 4.67                        | A <sup>13</sup>      | H3'         | 4.66                        |
| G <sup>1</sup> | H4'             | 4.07                        | A <sup>13</sup>      | H4'         | 4.07                        |
| G <sup>1</sup> | H5'             | 3.62                        | A <sup>13</sup>      | H5'         | 3.55                        |
| G <sup>1</sup> | H5''            | 3.60                        | A <sup>13</sup>      | H5''        | 3.59                        |
| G <sup>1</sup> | H8              | 7.79                        | A <sup>13</sup>      | H8          | 8.01                        |
| T <sup>2</sup> | H1'             | 5.76                        | C <sup>14</sup>      | H1'         | 5.04                        |
| T <sup>2</sup> | H2'             | 2.04                        | C <sup>14</sup>      | H2'         | 1.84                        |
| T <sup>2</sup> | H2''            | 2.38                        | C <sup>14</sup>      | H2''        | 2.09                        |
| T <sup>2</sup> | H3              | 13.67                       | C <sup>14</sup>      | H3'         | 4.62                        |
| T <sup>2</sup> | H3'             | 4.75                        | C <sup>14</sup>      | H4'         | 3.93                        |
| T <sup>2</sup> | H4'             | 4.09                        | C <sup>14</sup>      | H42         | 8.19                        |
| T <sup>2</sup> | H5'             | 3.98                        | C <sup>14</sup>      | H5          | 5.37                        |
| T <sup>2</sup> | H6              | 7.20                        | C <sup>14</sup>      | H5'         | 3.92                        |
| T <sup>2</sup> | CH <sub>3</sub> | 1.24                        | C <sup>14</sup>      | H6          | 7.25                        |
| G <sup>3</sup> | H1              | 12.62                       | A <sup>15</sup>      | H1'         | 5.61                        |
| G <sup>3</sup> | H1'             | 5.75                        | A <sup>15</sup>      | H2          | 7.14                        |



|                |      |       |                 |      |      |
|----------------|------|-------|-----------------|------|------|
| G <sup>3</sup> | H2'  | 2.46  | A <sup>15</sup> | H2'  | 2.57 |
| G <sup>3</sup> | H2'' | 2.57  | A <sup>15</sup> | H2'' | 2.67 |
| G <sup>3</sup> | H22  | 6.36  | A <sup>15</sup> | H3'  | 4.88 |
| G <sup>3</sup> | H3'  | 4.83  | A <sup>15</sup> | H4'  | 4.20 |
| G <sup>3</sup> | H4'  | 4.22  | A <sup>15</sup> | H5'  | 3.84 |
| G <sup>3</sup> | H5'  | 3.93  | A <sup>15</sup> | H5'' | 3.95 |
| G <sup>3</sup> | H5'' | 4.00  | A <sup>15</sup> | H62  | 6.05 |
| G <sup>3</sup> | H8   | 7.71  | A <sup>15</sup> | H8   | 8.05 |
| C <sup>4</sup> | H1'  | 5.61  | A <sup>16</sup> | H1'  | 5.71 |
| C <sup>4</sup> | H2'  | 1.85  | A <sup>16</sup> | H2   | 7.06 |
| C <sup>4</sup> | H2'' | 2.25  | A <sup>16</sup> | H2'  | 2.46 |
| C <sup>4</sup> | H3'  | 4.64  | A <sup>16</sup> | H2'' | 2.65 |
| C <sup>4</sup> | H4'  | 4.04  | A <sup>16</sup> | H3'  | 4.89 |
| C <sup>4</sup> | H42  | 8.12  | A <sup>16</sup> | H4'  | 4.26 |
| C <sup>4</sup> | H5   | 5.14  | A <sup>16</sup> | H5'  | 4.03 |
| C <sup>4</sup> | H5'  | 4.00  | A <sup>16</sup> | H5'' | 4.05 |
| C <sup>4</sup> | H5'' | 4.08  | A <sup>16</sup> | H61  | 7.31 |
| C <sup>4</sup> | H6   | 7.11  | A <sup>16</sup> | H62  | 5.87 |
| C <sup>4</sup> | H1'  | 5.56  | A <sup>16</sup> | H8   | 7.94 |
| G <sup>5</sup> | H1   | 12.91 | A <sup>17</sup> | H1'  | 5.86 |
| G <sup>5</sup> | H1'  | 5.88  | A <sup>17</sup> | H2   | 7.44 |
| G <sup>5</sup> | H2'  | 2.31  | A <sup>17</sup> | H2'  | 2.36 |
| G <sup>5</sup> | H2'' | 2.48  | A <sup>17</sup> | H2'' | 2.63 |
| G <sup>5</sup> | H3'  | 4.73  | A <sup>17</sup> | H3'  | 4.81 |
| G <sup>5</sup> | H4'  | 4.15  | A <sup>17</sup> | H4'  | 4.25 |
| G <sup>5</sup> | H5'  | 3.95  | A <sup>17</sup> | H5'  | 4.07 |

|                 |                              |       |                 |      |      |
|-----------------|------------------------------|-------|-----------------|------|------|
| G <sup>5</sup>  | H8                           | 7.64  | A <sup>17</sup> | H62  | 5.70 |
| Tg <sup>6</sup> | H1'                          | 5.63  | A <sup>17</sup> | H8   | 7.86 |
| Tg <sup>6</sup> | H2'                          | 2.07  | C <sup>18</sup> | H1'  | 5.53 |
| Tg <sup>6</sup> | H2''                         | 2.28  | C <sup>18</sup> | H2'  | 1.71 |
| Tg <sup>6</sup> | H3'                          | 4.57  | C <sup>18</sup> | H2'' | 2.19 |
| Tg <sup>6</sup> | H4'                          | 4.04  | C <sup>18</sup> | H3'  | 4.57 |
| Tg <sup>6</sup> | H5'                          | 3.79  | C <sup>18</sup> | H4'  | 4.00 |
| Tg <sup>6</sup> | H5''                         | 3.97  | C <sup>18</sup> | H41  | 7.03 |
| Tg <sup>6</sup> | H6 <i>cis</i>                | 4.58  | C <sup>18</sup> | H42  | 7.83 |
| Tg <sup>6</sup> | H6 <i>trans</i>              | 4.91  | C <sup>18</sup> | H5   | 5.02 |
| Tg <sup>6</sup> | CH <sub>3</sub> <i>cis</i>   | 0.49  | C <sup>18</sup> | H5'  | 3.95 |
| Tg <sup>6</sup> | CH <sub>3</sub> <i>trans</i> | 1.24  | C <sup>18</sup> | H5'' | 4.07 |
| G <sup>7</sup>  | H1                           | 12.28 | C <sup>18</sup> | H6   | 6.99 |
| G <sup>7</sup>  | H1'                          | 5.91  | A <sup>19</sup> | H1'  | 5.87 |
| G <sup>7</sup>  | H2'                          | 2.50  | A <sup>19</sup> | H2   | 7.46 |
| G <sup>7</sup>  | H2''                         | 2.72  | A <sup>19</sup> | H2'  | 2.26 |
| G <sup>7</sup>  | H22                          | 6.52  | A <sup>19</sup> | H2'' | 2.51 |
| G <sup>7</sup>  | H3'                          | 4.78  | A <sup>19</sup> | H3'  | 4.74 |
| G <sup>7</sup>  | H4'                          | 4.27  | A <sup>19</sup> | H4'  | 4.11 |
| G <sup>7</sup>  | H5'                          | 3.94  | A <sup>19</sup> | H5'  | 3.89 |
| G <sup>7</sup>  | H5''                         | 4.02  | A <sup>19</sup> | H5'' | 3.94 |
| G <sup>7</sup>  | H8                           | 7.75  | A <sup>19</sup> | H62  | 6.14 |
| T <sup>8</sup>  | H1'                          | 5.91  | A <sup>19</sup> | H8   | 7.83 |
| T <sup>8</sup>  | H2'                          | 1.99  | C <sup>20</sup> | H1'  | 5.38 |
| T <sup>8</sup>  | H2''                         | 2.45  | C <sup>20</sup> | H2'  | 1.86 |
| T <sup>8</sup>  | H3                           | 13.79 | C <sup>20</sup> | H2'' | 2.16 |

|                 |                 |       |                 |      |       |
|-----------------|-----------------|-------|-----------------|------|-------|
| T <sup>8</sup>  | H3'             | 4.73  | C <sup>20</sup> | H3'  | 4.64  |
| T <sup>8</sup>  | H4'             | 4.09  | C <sup>20</sup> | H4'  | 3.97  |
| T <sup>8</sup>  | H5'             | 4.02  | C <sup>20</sup> | H5   | 5.10  |
| T <sup>8</sup>  | H6              | 7.12  | C <sup>20</sup> | H5'  | 3.92  |
| T <sup>8</sup>  | CH <sub>3</sub> | 1.17  | C <sup>20</sup> | H6   | 7.12  |
| T <sup>9</sup>  | H1'             | 5.95  | G <sup>21</sup> | H1   | 12.67 |
| T <sup>9</sup>  | H2'             | 1.99  | G <sup>21</sup> | H1'  | 5.72  |
| T <sup>9</sup>  | H2''            | 2.43  | G <sup>21</sup> | H2'  | 2.43  |
| T <sup>9</sup>  | H3              | 13.85 | G <sup>21</sup> | H2'' | 2.54  |
| T <sup>9</sup>  | H3'             | 4.73  | G <sup>21</sup> | H22  | 6.30  |
| T <sup>9</sup>  | H4'             | 4.02  | G <sup>21</sup> | H3'  | 4.80  |
| T <sup>9</sup>  | H6              | 7.29  | G <sup>21</sup> | H4'  | 4.18  |
| T <sup>9</sup>  | CH <sub>3</sub> | 1.47  | G <sup>21</sup> | H5'  | 3.86  |
| T <sup>10</sup> | H1'             | 5.67  | G <sup>21</sup> | H5'' | 3.95  |
| T <sup>10</sup> | H2'             | 1.82  | G <sup>21</sup> | H8   | 7.65  |
| T <sup>10</sup> | H2''            | 2.20  | C <sup>22</sup> | H1'  | 5.50  |
| T <sup>10</sup> | H3              | 13.80 | C <sup>22</sup> | H2'  | 1.85  |
| T <sup>10</sup> | H3'             | 4.73  | C <sup>22</sup> | H2'' | 2.22  |
| T <sup>10</sup> | H4'             | 3.96  | C <sup>22</sup> | H3'  | 4.67  |
| T <sup>10</sup> | H5'             | 4.05  | C <sup>22</sup> | H4'  | 4.00  |
| T <sup>10</sup> | H6              | 7.15  | C <sup>22</sup> | H42  | 8.25  |
| T <sup>10</sup> | CH <sub>3</sub> | 1.57  | C <sup>22</sup> | H5   | 5.24  |
| G <sup>11</sup> | H1              | 12.53 | C <sup>22</sup> | H5'  | 4.03  |
| G <sup>11</sup> | H1'             | 5.93  | C <sup>22</sup> | H6   | 7.19  |
| G <sup>11</sup> | H2''            | 2.55  | A <sup>23</sup> | H1'  | 6.11  |
| G <sup>11</sup> | H22             | 6.53  | A <sup>23</sup> | H2   | 7.72  |

|                 |                 |      |                 |      |      |
|-----------------|-----------------|------|-----------------|------|------|
| G <sup>11</sup> | H3'             | 4.84 | A <sup>23</sup> | H2'  | 2.53 |
| G <sup>11</sup> | H4'             | 4.24 | A <sup>23</sup> | H2'' | 2.71 |
| G <sup>11</sup> | H5'             | 3.97 | A <sup>23</sup> | H3'  | 4.85 |
| G <sup>11</sup> | H8              | 7.81 | A <sup>23</sup> | H4'  | 4.23 |
| T <sup>12</sup> | H1'             | 6.09 | A <sup>23</sup> | H5'  | 3.95 |
| T <sup>12</sup> | H2''            | 2.10 | A <sup>23</sup> | H5'' | 3.99 |
| T <sup>12</sup> | H3'             | 4.39 | A <sup>23</sup> | H61  | 8.03 |
| T <sup>12</sup> | H4'             | 3.93 | A <sup>23</sup> | H8   | 8.10 |
| T <sup>12</sup> | H5'             | 3.96 | C <sup>24</sup> | H1'  | 5.95 |
| T <sup>12</sup> | H6              | 7.29 | C <sup>24</sup> | H2'  | 1.94 |
| T <sup>12</sup> | CH <sub>3</sub> | 1.50 | C <sup>24</sup> | H2'' | 1.99 |
|                 |                 |      | C <sup>24</sup> | H3'  | 4.32 |
|                 |                 |      | C <sup>24</sup> | H4'  | 3.87 |
|                 |                 |      | C <sup>24</sup> | H5   | 5.31 |
|                 |                 |      | C <sup>24</sup> | H5'  | 4.10 |
|                 |                 |      | C <sup>24</sup> | H5'' | 3.91 |
|                 |                 |      | C <sup>24</sup> | H6   | 7.25 |

**Table S3.** Resonance assignments for the *cis*-5*R*,6*S*-thymine glycol modified 5'-G<sup>1</sup>T<sup>2</sup>G<sup>3</sup>C<sup>4</sup>G<sup>5</sup>T<sup>6</sup>G<sup>7</sup>T<sup>8</sup>T<sup>9</sup>T<sup>10</sup>G<sup>11</sup>T<sup>12</sup>-3'•5'-A<sup>13</sup>C<sup>14</sup>A<sup>15</sup>A<sup>16</sup>A<sup>17</sup>C<sup>18</sup>G<sup>19</sup>C<sup>20</sup>G<sup>21</sup>C<sup>22</sup>A<sup>23</sup>C<sup>24</sup>-3'

| Primary Strand |             |                             | Complementary Strand |             |                             |
|----------------|-------------|-----------------------------|----------------------|-------------|-----------------------------|
| <i>Residue</i> | <i>Atom</i> | <i>Chemical Shift (ppm)</i> | <i>Residue</i>       | <i>Atom</i> | <i>Chemical Shift (ppm)</i> |
| G <sup>1</sup> | G5'         | 3.63                        | A <sup>13</sup>      | H1'         | 6.01                        |
| G <sup>1</sup> | H1'         | 5.85                        | A <sup>13</sup>      | H2          | 7.82                        |
| G <sup>1</sup> | H2'         | 2.48                        | A <sup>13</sup>      | H2'         | 2.43                        |
| G <sup>1</sup> | H2''        | 2.63                        | A <sup>13</sup>      | H2''        | 2.58                        |
| G <sup>1</sup> | H3'         | 4.66                        | A <sup>13</sup>      | H3'         | 4.66                        |
| G <sup>1</sup> | H4'         | 4.07                        | A <sup>13</sup>      | H4'         | 4.07                        |
| G <sup>1</sup> | H5'         | 3.59                        | A <sup>13</sup>      | H5'         | 3.55                        |
| G <sup>1</sup> | H5''        | 3.62                        | A <sup>13</sup>      | H8          | 8.02                        |
| G <sup>1</sup> | H8          | 7.79                        | C <sup>14</sup>      | H1'         | 5.02                        |
| T <sup>2</sup> | H1'         | 5.74                        | C <sup>14</sup>      | H2'         | 1.83                        |
| T <sup>2</sup> | H2'         | 2.02                        | C <sup>14</sup>      | H2''        | 2.07                        |
| T <sup>2</sup> | H2''        | 2.36                        | C <sup>14</sup>      | H3'         | 4.62                        |
| T <sup>2</sup> | H3          | 13.62                       | C <sup>14</sup>      | H4'         | 3.93                        |
| T <sup>2</sup> | H3'         | 4.74                        | C <sup>14</sup>      | H5          | 5.35                        |
| T <sup>2</sup> | H4'         | 4.08                        | C <sup>14</sup>      | H5'         | 3.90                        |
| T <sup>2</sup> | H5'         | 3.97                        | C <sup>14</sup>      | H5''        | 3.88                        |
| T <sup>2</sup> | H6          | 7.20                        | C <sup>14</sup>      | H6          | 7.25                        |

|                |                 |       |                 |      |      |
|----------------|-----------------|-------|-----------------|------|------|
| T <sup>2</sup> | CH <sub>3</sub> | 1.23  | C <sup>14</sup> | H62  | 8.16 |
| G <sup>3</sup> | H1              | 12.61 | A <sup>15</sup> | H1'  | 5.59 |
| G <sup>3</sup> | H1'             | 5.73  | A <sup>15</sup> | H2   | 7.10 |
| G <sup>3</sup> | H2'             | 2.45  | A <sup>15</sup> | H2'  | 2.57 |
| G <sup>3</sup> | H2''            | 2.54  | A <sup>15</sup> | H2'' | 2.66 |
| G <sup>3</sup> | H22             | 6.37  | A <sup>15</sup> | H3'  | 4.88 |
| G <sup>3</sup> | H3'             | 4.82  | A <sup>15</sup> | H4'  | 4.20 |
| G <sup>3</sup> | H4'             | 4.21  | A <sup>15</sup> | H5'  | 3.84 |
| G <sup>3</sup> | H5'             | 3.85  | A <sup>15</sup> | H5'' | 3.94 |
| G <sup>3</sup> | H8              | 7.71  | A <sup>15</sup> | H62  | 6.00 |
| C <sup>4</sup> | H1'             | 5.62  | A <sup>15</sup> | H8   | 8.05 |
| C <sup>4</sup> | H2'             | 1.71  | A <sup>16</sup> | H1'  | 5.70 |
| C <sup>4</sup> | H2''            | 2.19  | A <sup>16</sup> | H2   | 7.03 |
| C <sup>4</sup> | H3'             | 4.66  | A <sup>16</sup> | H2'  | 2.46 |
| C <sup>4</sup> | H4'             | 4.02  | A <sup>16</sup> | H2'' | 2.65 |
| C <sup>4</sup> | H42             | 8.10  | A <sup>16</sup> | H3'  | 4.89 |
| C <sup>4</sup> | H5              | 5.15  | A <sup>16</sup> | H4'  | 4.26 |
| C <sup>4</sup> | H5'             | 3.97  | A <sup>16</sup> | H5'  | 4.04 |
| C <sup>4</sup> | H5''            | 4.05  | A <sup>16</sup> | H5'' | 4.05 |
| C <sup>4</sup> | H6              | 7.08  | A <sup>16</sup> | H61  | 7.29 |
| G <sup>5</sup> | H1              | 12.82 | A <sup>16</sup> | H62  | 5.82 |
| G <sup>5</sup> | H1'             | 5.89  | A <sup>16</sup> | H8   | 7.94 |
| G <sup>5</sup> | H2'             | 2.40  | A <sup>17</sup> | H1'  | 5.87 |
| G <sup>5</sup> | H2''            | 2.56  | A <sup>17</sup> | H2   | 7.47 |
| G <sup>5</sup> | H3'             | 4.79  | A <sup>17</sup> | H2'  | 2.35 |
| G <sup>5</sup> | H4'             | 4.18  | A <sup>17</sup> | H2'' | 2.62 |

|                 |                 |       |                 |      |      |
|-----------------|-----------------|-------|-----------------|------|------|
| G <sup>5</sup>  | H5'             | 3.91  | A <sup>17</sup> | H3'  | 4.80 |
| G <sup>5</sup>  | H5''            | 3.87  | A <sup>17</sup> | H4'  | 4.25 |
| G <sup>5</sup>  | H8              | 7.72  | A <sup>17</sup> | H5'  | 4.06 |
| G <sup>5</sup>  | H5'             | 4.10  | A <sup>17</sup> | H62  | 5.67 |
| Tg <sup>6</sup> | H1'             | 5.46  | A <sup>17</sup> | H8   | 7.86 |
| Tg <sup>6</sup> | H2'             | 2.06  | C <sup>18</sup> | H1'  | 5.56 |
| Tg <sup>6</sup> | H2''            | 2.06  | C <sup>18</sup> | H2'  | 1.72 |
| Tg <sup>6</sup> | H3'             | 4.53  | C <sup>18</sup> | H2'' | 2.19 |
| Tg <sup>6</sup> | H4'             | 4.01  | C <sup>18</sup> | H3'  | 4.53 |
| Tg <sup>6</sup> | H6              | 4.70  | C <sup>18</sup> | H4'  | 4.01 |
| Tg <sup>6</sup> | CH <sub>3</sub> | 0.91  | C <sup>18</sup> | H42  | 7.80 |
| G <sup>7</sup>  | H1              | 12.67 | C <sup>18</sup> | H5   | 4.99 |
| G <sup>7</sup>  | H1'             | 5.88  | C <sup>18</sup> | H5'  | 3.92 |
| G <sup>7</sup>  | H2'             | 2.49  | C <sup>18</sup> | H5'' | 4.05 |
| G <sup>7</sup>  | H2''            | 2.70  | C <sup>18</sup> | H6   | 6.96 |
| G <sup>7</sup>  | H22             | 6.33  | G <sup>19</sup> | H1'  | 5.60 |
| G <sup>7</sup>  | H3'             | 4.77  | G <sup>19</sup> | H2'  | 2.15 |
| G <sup>7</sup>  | H4'             | 4.22  | G <sup>19</sup> | H2'' | 2.36 |
| G <sup>7</sup>  | H5'             | 3.84  | G <sup>19</sup> | H3'  | 4.68 |
| G <sup>7</sup>  | H5''            | 3.84  | G <sup>19</sup> | H4'  | 4.02 |
| G <sup>7</sup>  | H8              | 7.81  | G <sup>19</sup> | H5'  | 3.88 |
| T <sup>8</sup>  | H1'             | 5.93  | G <sup>19</sup> | H5'' | 3.92 |
| T <sup>8</sup>  | H2'             | 2.00  | G <sup>19</sup> | H8   | 7.42 |
| T <sup>8</sup>  | H2''            | 2.45  | C <sup>20</sup> | H1'  | 5.44 |
| T <sup>8</sup>  | H3              | 13.76 | C <sup>20</sup> | H2'  | 1.89 |
| T <sup>8</sup>  | H3'             | 4.73  | C <sup>20</sup> | H2'' | 2.18 |

|                 |                 |       |                 |      |       |
|-----------------|-----------------|-------|-----------------|------|-------|
| T <sup>8</sup>  | H4'             | 4.09  | C <sup>20</sup> | H3'  | 4.66  |
| T <sup>8</sup>  | H5'             | 4.05  | C <sup>20</sup> | H4'  | 3.98  |
| T <sup>8</sup>  | H5''            | 4.00  | C <sup>20</sup> | H5   | 5.17  |
| T <sup>8</sup>  | H6              | 7.13  | C <sup>20</sup> | H5'  | 3.88  |
| T <sup>8</sup>  | CH <sub>3</sub> | 1.16  | C <sup>20</sup> | H6   | 7.19  |
| T <sup>9</sup>  | H1'             | 5.96  | G <sup>21</sup> | H1   | 12.78 |
| T <sup>9</sup>  | H2'             | 2.00  | G <sup>21</sup> | H1'  | 5.73  |
| T <sup>9</sup>  | H2''            | 2.44  | G <sup>21</sup> | H2'  | 2.47  |
| T <sup>9</sup>  | H3              | 13.84 | G <sup>21</sup> | H2'' | 2.56  |
| T <sup>9</sup>  | H3'             | 4.73  | G <sup>21</sup> | H22  | 6.30  |
| T <sup>9</sup>  | H4'             | 4.02  | G <sup>21</sup> | H3'  | 4.81  |
| T <sup>9</sup>  | H5'             | 3.97  | G <sup>21</sup> | H4'  | 4.20  |
| T <sup>9</sup>  | H5''            | 4.02  | G <sup>21</sup> | H5'  | 3.98  |
| T <sup>9</sup>  | H6              | 7.30  | G <sup>21</sup> | H5'' | 3.84  |
| T <sup>9</sup>  | CH <sub>3</sub> | 1.47  | G <sup>21</sup> | H8   | 7.72  |
| T <sup>10</sup> | H1'             | 5.67  | C <sup>22</sup> | H1'  | 5.48  |
| T <sup>10</sup> | H2'             | 1.83  | C <sup>22</sup> | H2'  | 1.84  |
| T <sup>10</sup> | H2''            | 2.21  | C <sup>22</sup> | H2'' | 2.21  |
| T <sup>10</sup> | H3              | 13.76 | C <sup>22</sup> | H3'  | 4.66  |
| T <sup>10</sup> | H3'             | 4.73  | C <sup>22</sup> | H4'  | 4.02  |
| T <sup>10</sup> | H4'             | 4.05  | C <sup>22</sup> | H42  | 8.22  |
| T <sup>10</sup> | H5'             | 3.96  | C <sup>22</sup> | H5   | 5.28  |
| T <sup>10</sup> | H5''            | 3.93  | C <sup>22</sup> | H6   | 7.19  |
| T <sup>10</sup> | H6              | 7.16  | A <sup>23</sup> | H1'  | 6.10  |
| T <sup>10</sup> | CH <sub>3</sub> | 1.57  | A <sup>23</sup> | H2   | 7.69  |
| G <sup>11</sup> | H1              | 12.50 | A <sup>23</sup> | H2'  | 2.53  |



|                 |                 |      |                 |      |      |
|-----------------|-----------------|------|-----------------|------|------|
| G <sup>11</sup> | H1'             | 5.91 | A <sup>23</sup> | H2'' | 2.71 |
| G <sup>11</sup> | H2'             | 2.54 | A <sup>23</sup> | H3'  | 4.85 |
| G <sup>11</sup> | H22             | 6.49 | A <sup>23</sup> | H4'  | 4.24 |
| G <sup>11</sup> | H3'             | 4.84 | A <sup>23</sup> | H5'  | 3.99 |
| G <sup>11</sup> | H4'             | 4.24 | A <sup>23</sup> | H5'' | 3.94 |
| G <sup>11</sup> | H5'             | 3.97 | A <sup>23</sup> | H8   | 8.10 |
| G <sup>11</sup> | H8              | 7.80 | C <sup>24</sup> | H1'  | 5.92 |
| T <sup>12</sup> | H1'             | 6.08 | C <sup>24</sup> | H2'  | 1.94 |
| T <sup>12</sup> | H2'             | 2.10 | C <sup>24</sup> | H2'' | 1.99 |
| T <sup>12</sup> | H3'             | 4.38 | C <sup>24</sup> | H3'  | 4.31 |
| T <sup>12</sup> | H4'             | 3.93 | C <sup>24</sup> | H4'  | 3.86 |
| T <sup>12</sup> | H5'             | 4.08 | C <sup>24</sup> | H5   | 5.24 |
| T <sup>12</sup> | H6              | 7.26 | C <sup>24</sup> | H5'  | 3.90 |
| T <sup>12</sup> | CH <sub>3</sub> | 1.47 | C <sup>24</sup> | H5'' | 3.87 |
|                 |                 |      | C <sup>24</sup> | H6   | 7.21 |

**Figure S1.** HPLC analysis of enzyme digest products of control 12mer duplex (panel A) and Tg modified 12mer duplex (Tg•A) (panel B). Cytidine eluted first at 7.7 mins followed by guanosine (11.9 mins), deoxythymidine (13.2 mins), and adenosine (15.9 mins). The thymine glycol nucleoside eluted at 11.2 mins (panel B). The UV trace of Tg nucleoside is show in panel C.

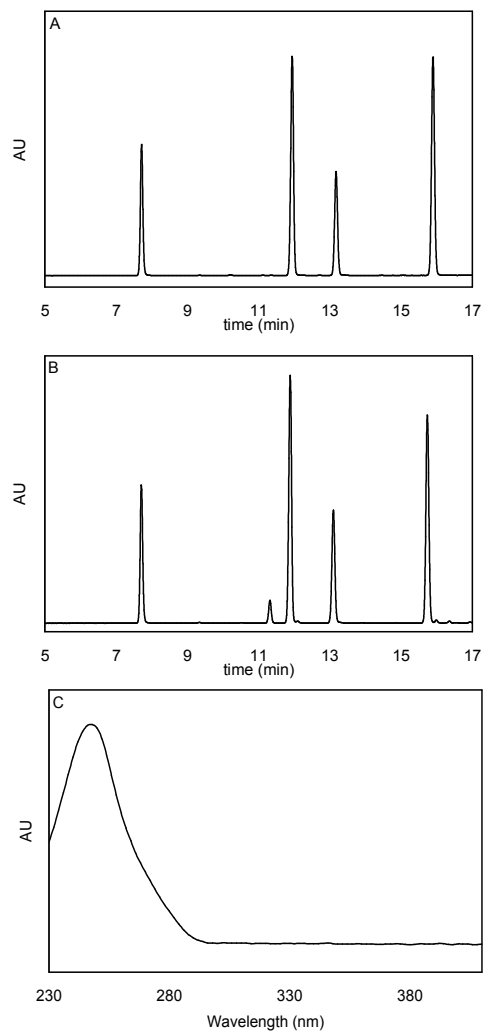

Supplement: ja8016544-File002.pdf [file ja8016544-File002.pdf]
